# Supplementary material for: Using MemTrax memory test to screen for post-stroke cognitive impairment after ischemic stroke: a cross-sectional study
Source: PubMed Central journal article supplement (PMC10387538; doi:10.3389/fnhum.2023.1195220), 2023-07-17

# supplementary Fig.1-PSCI Diagnostic Flowchart

## Abbreviations:

CDR: Clinical Dementia Rating

MoCA: Montreal Cognitive Assessment

NPI: Neuropsychiatric Inventory

PSCI: Post-stroke Cognitive Impairment

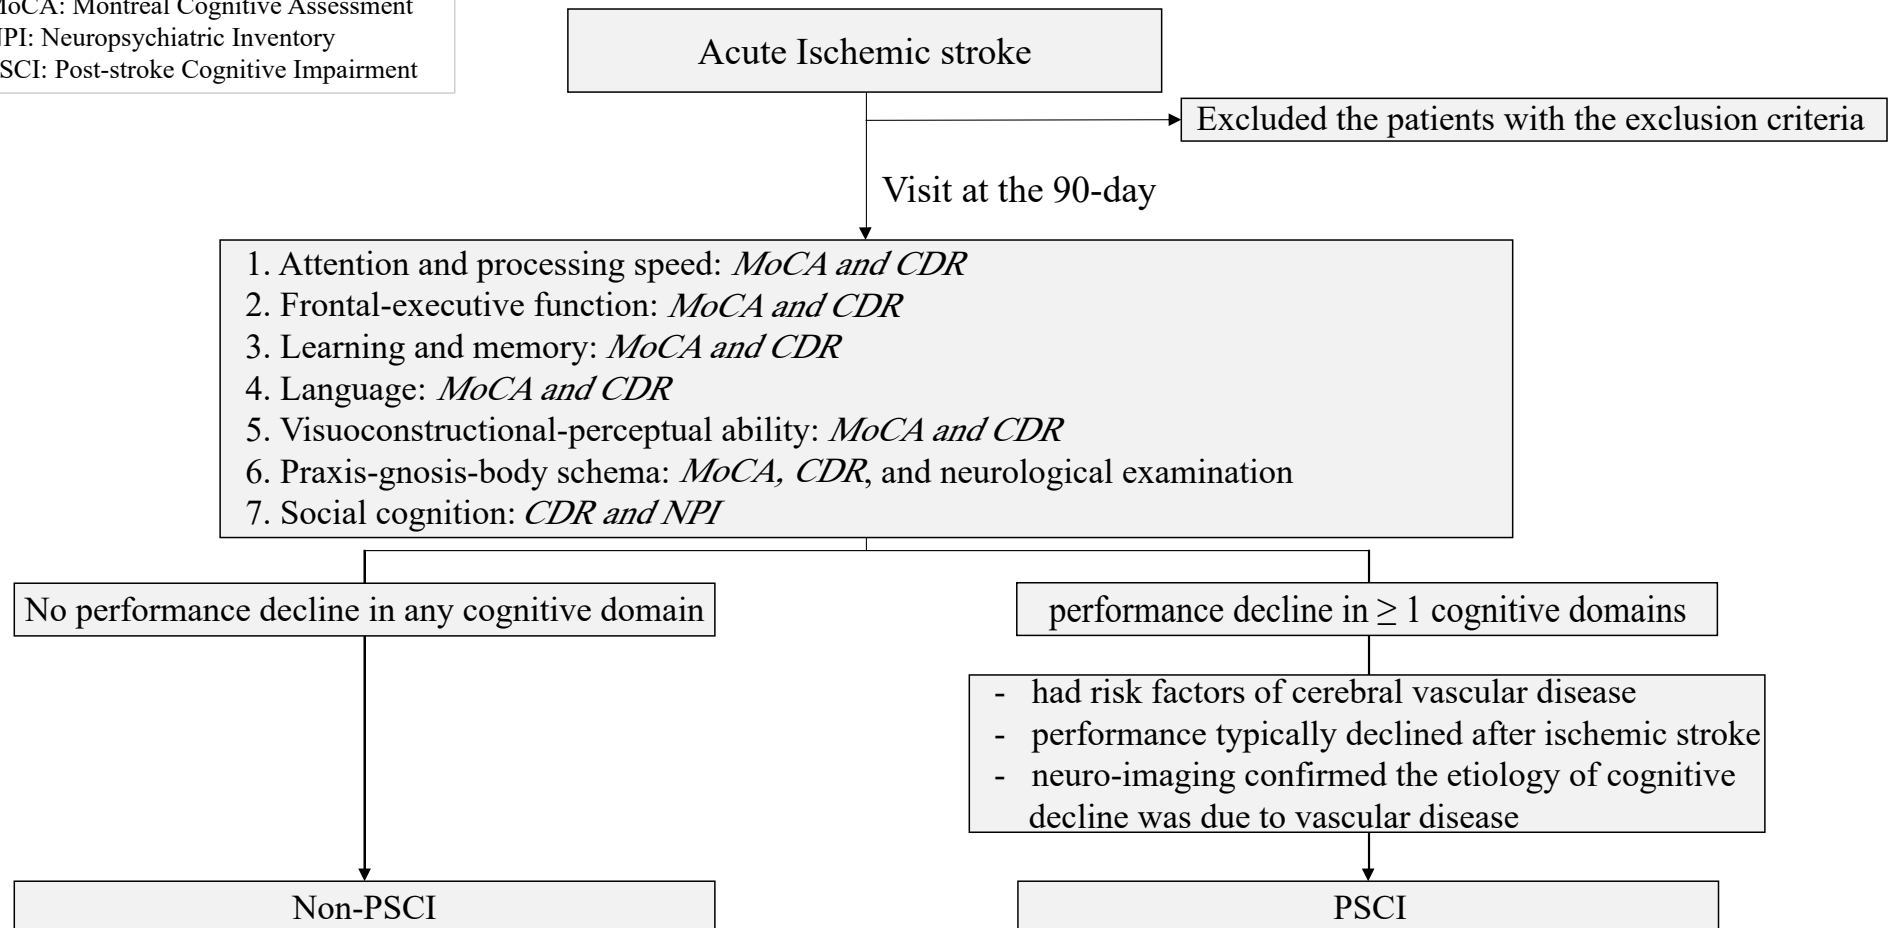

Supplement: Image_1.pdf [file Image_1.pdf]
